# Supplementary material
Source: PubMed Central journal article supplement (PMC4674309)
Supplement: NIHMS728209-supplement-3.pdf [file NIHMS728209-supplement-3.pdf]

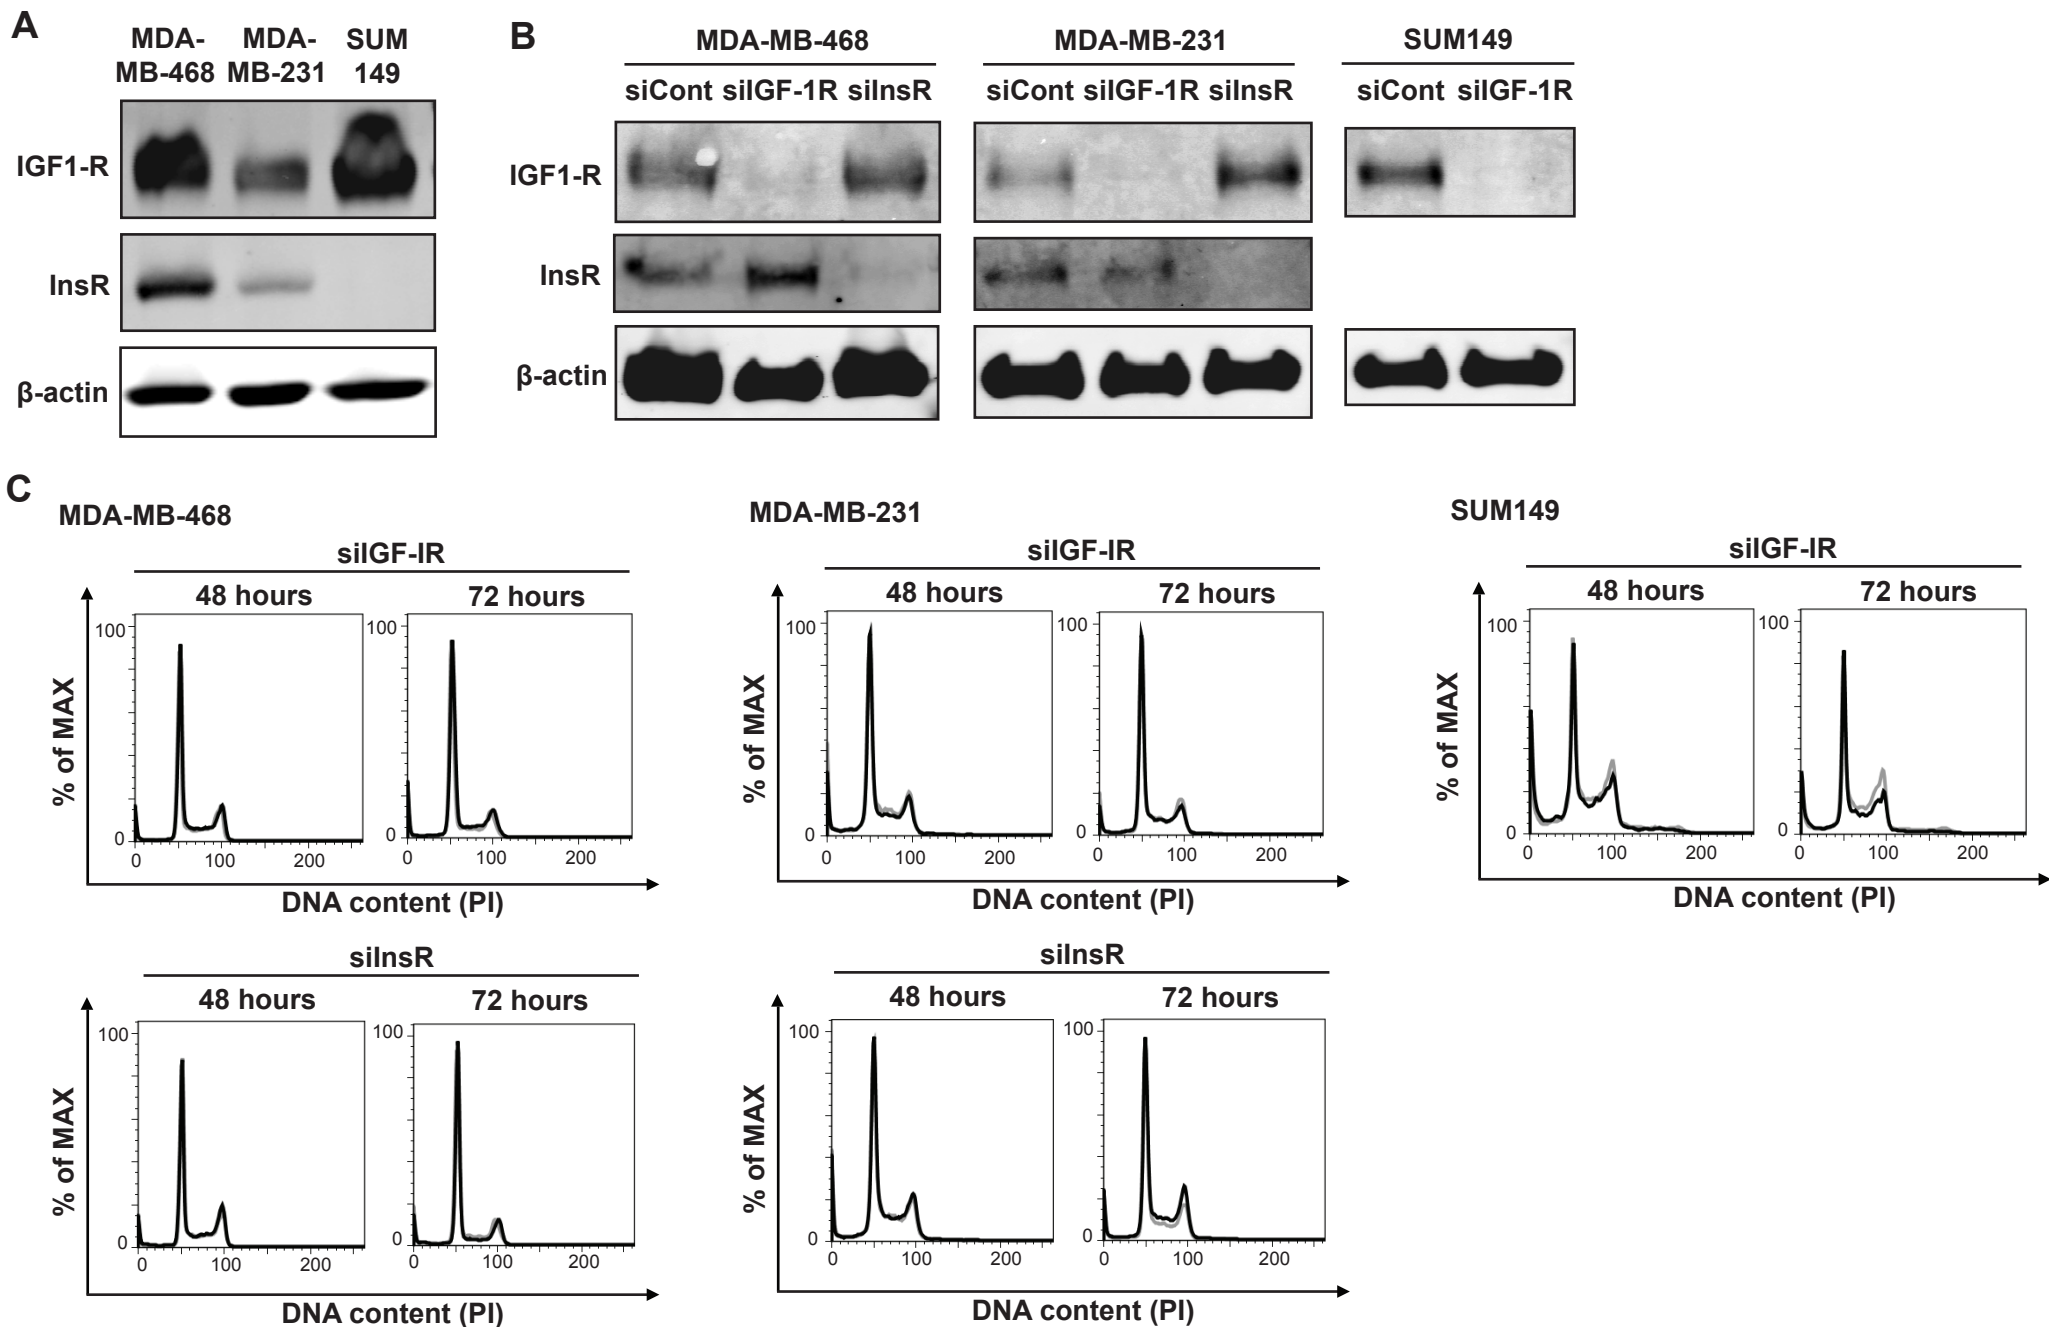

**Supplementary Figure S3. Knockdown of neither IGF-IR nor InsR changed cell cycle profiles or induced cell death.**

Knockdown experiments with siRNAs that target IGF-IR or InsR in MDA-MB-468, MDA-MB-231, SUM149 cells.

**A**, Expression analyses of IGF-IR and InsR in MDA-MB-468, MDA-MB-231, SUM149 cells by Western blotting.  $\beta$ -actin, loading control.

**B**, Knock down efficiencies of siRNAs to IGF-IR or InsR were confirmed by Western blotting. In SUM149, only IGF-IR knockdown was performed in **(B)**, **(C)** because SUM149 did not express InsR as shown in **(A)**.

**C**, Representative histograms depict cell cycle profiles of MDA-MB-468, MDA-MB-231, and SUM149 cells treated with siRNAs to IGF-IR or InsR for 48 or 72 hours (**black lines**). The cell cycle profiles treated with control siRNA are overlapped with the paired sample histogram (**gray lines**).
