# Supplementary material
Source: PubMed Central journal article supplement (PMC4674309)
Supplement: NIHMS728209-supplement-7.pdf [file NIHMS728209-supplement-7.pdf]

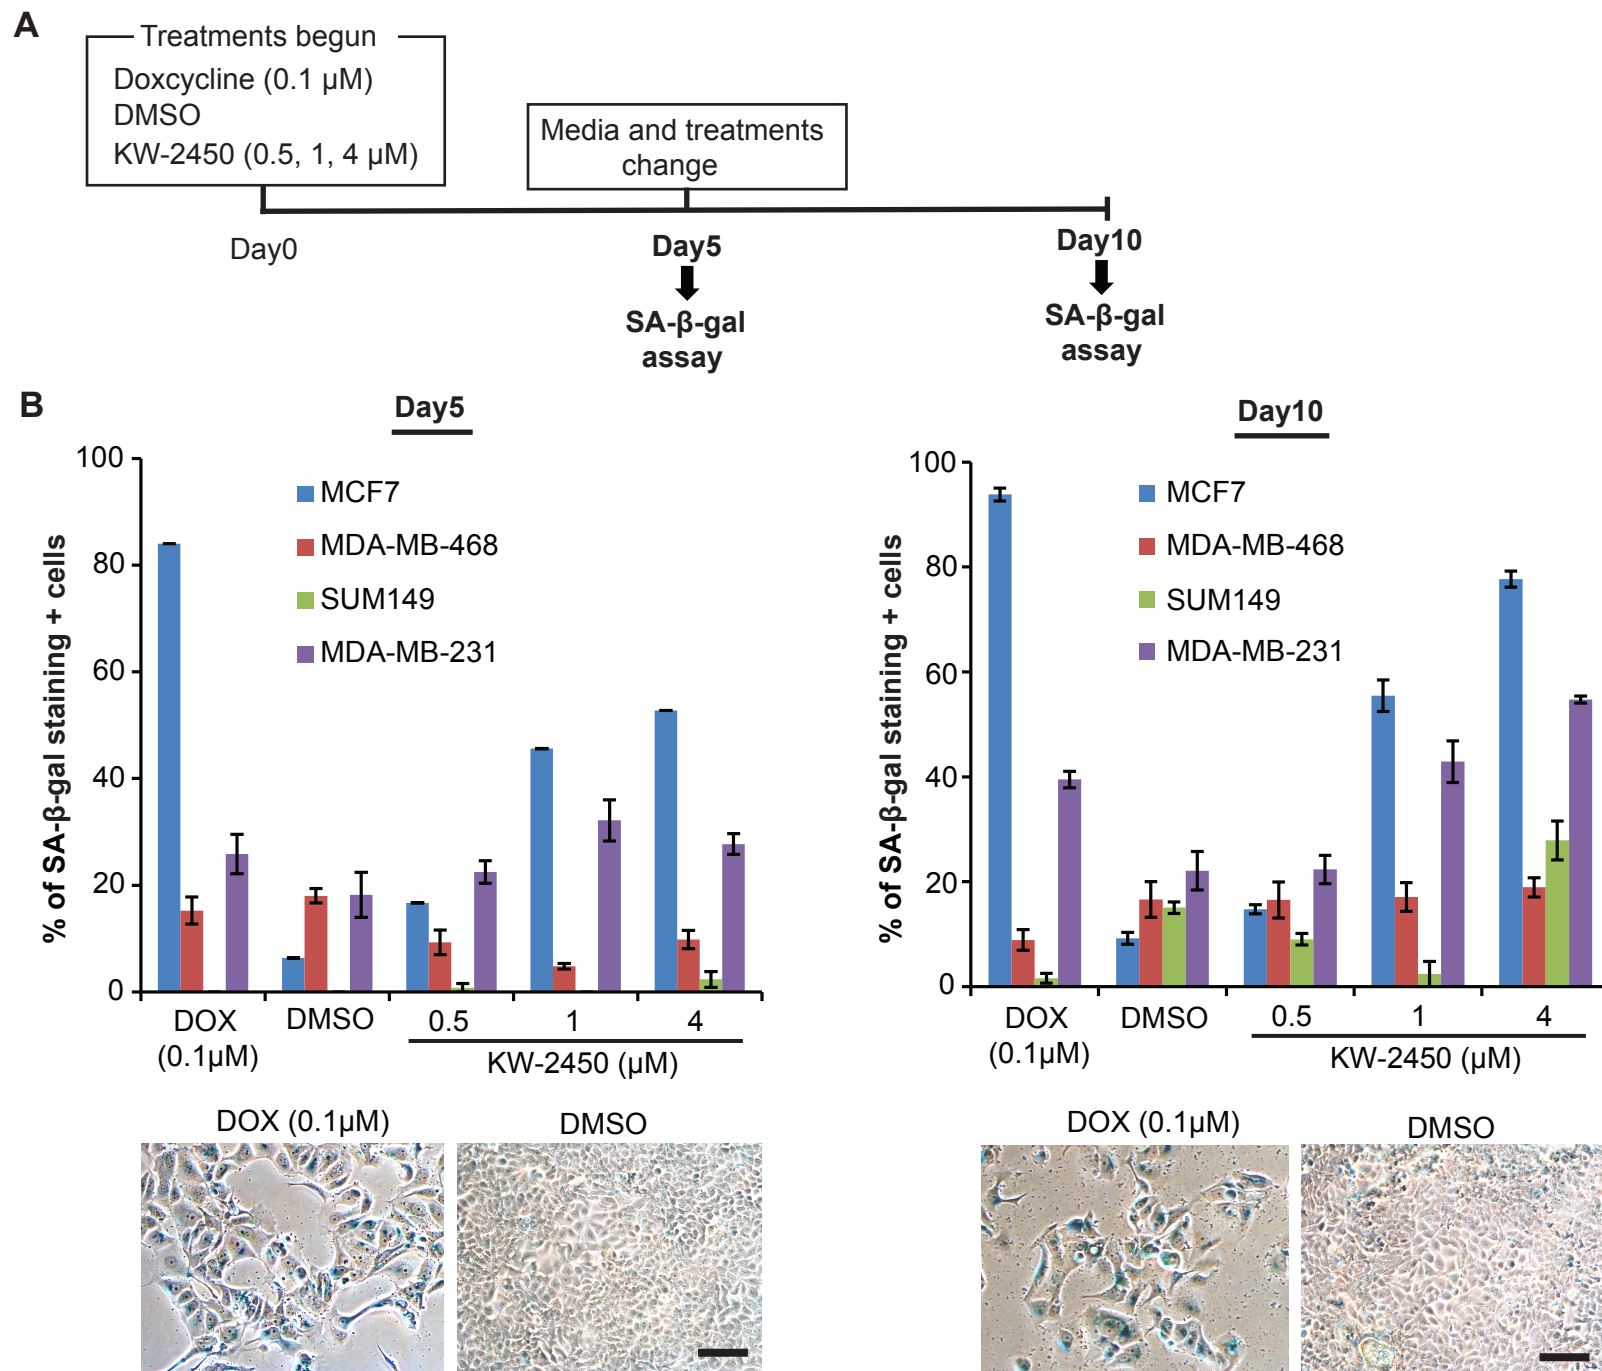

**Supplementary Figure S7. Senescence-associated  $\beta$ -galactosidase (SA- $\beta$ -gal) assay in TNBC cells treated with KW-2450.**

**A**, Experimental schema of SA- $\beta$ -gal assay. **B**, Histograms depict percentage of SA- $\beta$ -gal staining + cells in TNBC cells treated with KW-2450 (0.5, 1, 4  $\mu\text{M}$ ), doxycycline (0.1  $\mu\text{M}$ ), or DMSO for 5 or 10 days. MCF7 cells treated with doxycycline (0.1  $\mu\text{M}$ ) were used as a positive control. The images of MCF7 cells shown at the bottom were positive and negative references to determine the positivity of SA- $\beta$ -gal staining cells for 5 or 10 days. Error bars, s.e.m.
